# Supplementary material for: Dynamics of Soil Organic Carbon and CO2 Flux under Cover Crop and No-Till Management in Soybean Cropping Systems of the Mid-South (USA)
Source: MDPI journal article supplement (doi:10.3390/environments9090109), 2022-08-27
Supplement: s1 [file s1]

**Table S1.** Percent Organic Carbon Mixed Model Results.

| Fixed Effects | Estimate | Standard Error | <i>t</i> | <i>p</i>        |
|---------------|----------|----------------|----------|-----------------|
| NT            | 1.25     | 0.08           | 15.16    | <b>&lt;0.01</b> |
| RT            | 1.03     | 0.08           | 12.51    | <b>&lt;0.01</b> |
| RC            | 0.01     | 0.11           | 0.08     | 0.94            |
| RY            | -0.01    | 0.11           | -0.08    | 0.94            |
| July          | -0.04    | 0.11           | -0.40    | 0.69            |
| June          | -0.10    | 0.11           | -0.92    | 0.36            |
| May           | 0.10     | 0.11           | 0.97     | 0.33            |
| Sept          | -0.15    | 0.11           | -1.39    | 0.17            |
| 2020          | -0.07    | 0.11           | -0.65    | 0.52            |
| RTxRC         | 0.09     | 0.15           | 0.60     | 0.55            |
| RTxRY         | 0.06     | 0.15           | 0.40     | 0.69            |
| RTxJuly       | -0.09    | 0.15           | -0.60    | 0.55            |
| RTxJune       | 0.15     | 0.15           | 1.01     | 0.32            |
| RTxMay        | -0.15    | 0.15           | -0.99    | 0.32            |
| RTxSept       | 0.11     | 0.15           | 0.72     | 0.47            |
| RCxJuly       | -0.06    | 0.15           | -0.41    | 0.69            |
| RYxJuly       | -0.03    | 0.15           | -0.17    | 0.87            |
| RCxJune       | 0.07     | 0.15           | 0.46     | 0.65            |
| RYxJune       | 0.12     | 0.15           | 0.79     | 0.43            |
| RCxMay        | 0.03     | 0.15           | 0.21     | 0.83            |
| RYxMay        | 0.08     | 0.15           | 0.55     | 0.58            |
| RCxSept       | 0.33     | 0.15           | 2.17     | <b>0.03</b>     |
| RYxSept       | 0.28     | 0.15           | 1.87     | 0.06*           |
| RTx2020       | 0.02     | 0.15           | 0.12     | 0.90            |
| RCx2020       | 0.09     | 0.15           | 0.57     | 0.57            |
| RYx2020       | 0.05     | 0.15           | 0.32     | 0.75            |
| Julyx2020     | 0.07     | 0.15           | 0.48     | 0.63            |
| Junex2020     | 0.20     | 0.15           | 1.32     | 0.19            |
| Mayx2020      | -0.09    | 0.15           | -0.62    | 0.54            |
| Setpx2020     | 0.10     | 0.15           | 0.64     | 0.52            |
| RTxRCxJuly    | 0.24     | 0.21           | 1.12     | 0.26            |
| RTxRYxJuly    | 0.11     | 0.21           | 0.53     | 0.60            |
| RTxRCxJune    | 0.05     | 0.21           | 0.24     | 0.81            |
| RTxRYxJune    | -0.08    | 0.21           | -0.36    | 0.72            |
| RTxRCxMay     | 0.13     | 0.21           | 0.62     | 0.54            |
| RTxRYxMay     | 0.06     | 0.21           | 0.30     | 0.77            |
| RTxRCxSept    | -0.24    | 0.21           | -1.14    | 0.26            |
| RTxRYxSept    | -0.14    | 0.21           | -0.66    | 0.51            |
| RTxRCx2020    | -0.12    | 0.21           | -0.58    | 0.56            |
| RTxRYx2020    | 0.16     | 0.21           | 0.74     | 0.46            |
| RTxJunex2020  | -0.22    | 0.21           | -1.01    | 0.32            |
| RTxMayx2020   | 0.19     | 0.21           | 0.90     | 0.37            |
| RTxSeptx2020  | -0.04    | 0.21           | -0.20    | 0.84            |
| RCxJulyx2020  | 0.26     | 0.21           | 1.24     | 0.22            |
| RYxJulyx2020  | 0.10     | 0.21           | 0.45     | 0.66            |
| RCxJunex2020  | 0.01     | 0.21           | 0.03     | 0.97            |

|                 |       |      |       |       |
|-----------------|-------|------|-------|-------|
| RYxJunex2020    | -0.13 | 0.21 | -0.59 | 0.56  |
| RCxMayx2020     | -0.26 | 0.21 | -1.21 | 0.23  |
| RYxMayx2020     | -0.13 | 0.21 | -0.61 | 0.54  |
| RCxSeptx2020    | -0.22 | 0.21 | -1.05 | 0.30  |
| RYxSeptx2020    | -0.20 | 0.21 | -0.95 | 0.34  |
| RTxRCxJulyx2020 | -0.57 | 0.30 | -1.89 | 0.06* |
| RTxRYxJulyx2020 | -0.32 | 0.30 | -1.05 | 0.30  |
| RTxRCxJunex2020 | -0.12 | 0.30 | -0.40 | 0.69  |
| RTxRYxJunex2020 | 0.10  | 0.30 | 0.32  | 0.75  |
| RTxRCxMayx2020  | 0.00  | 0.30 | 0.00  | 1.00  |
| RTxRYxMayx2020  | -0.17 | 0.30 | -0.57 | 0.57  |
| RTxRCxSeptx2020 | 0.18  | 0.30 | 0.58  | 0.56  |
| RTxRYxSeptx2020 | -0.01 | 0.30 | -0.02 | 0.98  |
| Random Effect   | sd    |      |       |       |
| Block           | 0.06  |      |       |       |

*P*-values were estimated via t-tests using the Satterthwaite approximations to degrees of freedom. Bolded values indicate a significant effect. Asterisk indicate suggested effect.

**Table S2.** Mixed Model Results of Soil Environmental Variables Relationship with %OC and CO<sub>2</sub> Flux.

| Response             | Fixed Effect        | Estimate | Standard Error. | <i>t</i> | <i>p</i>        |
|----------------------|---------------------|----------|-----------------|----------|-----------------|
| %OC                  | Bacterial Abundance | 0.04     | 0.01            | 3.32     | <b>&lt;0.01</b> |
|                      | pH                  | -0.05    | 0.01            | -4.54    | <b>&lt;0.01</b> |
|                      | Soil Temperature    | 0.01     | 0.01            | 0.66     | 0.51            |
|                      | Random Effect       | sd       |                 |          |                 |
|                      | Block               | 1.18     |                 |          |                 |
| CO <sub>2</sub> Flux | Bacterial Abundance | -15.23   | 5.86            | -2.59    | <b>0.01</b>     |
|                      | pH                  | -15.15   | 6.09            | -2.49    | <b>0.01</b>     |
|                      | Soil Temperature    | 6.1      | 5.83            | 1.05     | 0.30            |
|                      | Random Effect       | sd       |                 |          |                 |
|                      | Block               | 446.1    |                 |          |                 |

P-values were estimated via t-tests using the Satterthwaite approximations to degrees of freedom. Bolded values indicate a significant effect. Asterisk indicate a marginal effect.

**Table S3.** CO<sub>2</sub> Flux Mixed Model Results.

| <b>Fixed Effects</b> | <b>Estimate</b> | <b>Standard Error</b> | <b><i>t</i></b> | <b><i>p</i></b> |
|----------------------|-----------------|-----------------------|-----------------|-----------------|
| NT                   | 509.90          | 35.18                 | 14.49           | <b>&lt;0.01</b> |
| RT                   | 501.58          | 35.18                 | 14.26           | <b>&lt;0.01</b> |
| RC                   | 47.77           | 49.56                 | 0.96            | 0.34            |
| RY                   | 1.38            | 49.56                 | 0.03            | 0.98            |
| July                 | -79.37          | 49.56                 | -1.60           | 0.11*           |
| June                 | -84.74          | 49.56                 | -1.71           | 0.09*           |
| May                  | -99.19          | 49.56                 | -2.00           | <b>0.05</b>     |
| Sept                 | -145.80         | 49.56                 | -2.94           | <b>&lt;0.01</b> |
| 2020                 | -92.81          | 49.56                 | -1.87           | 0.06*           |
| RTxRC                | 2.58            | 70.09                 | 0.04            | 0.97            |
| RTxRY                | 101.98          | 70.09                 | 1.46            | 0.15            |
| RTxJuly              | 2.34            | 70.09                 | 0.03            | 0.97            |
| RTxSept              | -74.45          | 70.09                 | -1.06           | 0.29            |
| RCxJuly              | -60.91          | 70.09                 | -0.87           | 0.39            |
| RYxJuly              | 0.73            | 70.09                 | 0.01            | 0.99            |
| RCxJune              | -55.69          | 70.09                 | -0.80           | 0.43            |
| RYxJune              | -3.66           | 70.09                 | -0.05           | 0.96            |
| RCxMay               | -38.91          | 70.09                 | -0.56           | 0.58            |
| RYxMay               | 20.71           | 70.09                 | 0.30            | 0.77            |
| RCxSept              | -92.04          | 70.09                 | -1.31           | 0.19            |
| RYxSept              | -39.42          | 70.09                 | -0.56           | 0.57            |
| RTx2020              | 13.85           | 70.09                 | 0.20            | 0.84            |
| RCx2020              | -11.86          | 70.09                 | -0.17           | 0.87            |
| RYx2020              | 17.65           | 70.09                 | 0.25            | 0.80            |
| Julyx2020            | 119.82          | 70.09                 | 1.71            | 0.09*           |
| Junex2020            | 101.54          | 70.09                 | 1.45            | 0.15            |
| Mayx2020             | 126.61          | 70.09                 | 1.81            | 0.07*           |
| Setpx2020            | 169.21          | 70.09                 | 2.41            | <b>0.02</b>     |
| RTxRCxJuly           | 30.45           | 99.13                 | 0.31            | 0.76            |
| RTxRYxJuly           | -102.98         | 99.13                 | -1.04           | 0.30            |
| RTxRCxJune           | 6.50            | 99.13                 | 0.07            | 0.95            |
| RTxRYxJune           | -98.26          | 99.13                 | -0.99           | 0.32            |
| RTxRCxMay            | -10.03          | 99.13                 | -0.10           | 0.92            |
| RTxRYxMay            | -118.96         | 99.13                 | -1.20           | 0.23            |
| RTxRCxSept           | 8.79            | 99.13                 | 0.09            | 0.93            |
| RTxRYxSept           | -18.92          | 99.13                 | -0.19           | 0.85            |
| RTxRCx2020           | 9.23            | 99.13                 | 0.09            | 0.93            |
| RTxRYx2020           | -64.11          | 99.13                 | -0.65           | 0.52            |
| RTxJulyx2020         | 121.92          | 99.13                 | 1.23            | 0.22            |
| RTxJunex2020         | -10.64          | 99.13                 | -0.11           | 0.91            |
| RTxMayx2020          | -24.22          | 99.13                 | -0.24           | 0.81            |
| RTxSeptx2020         | 67.86           | 99.13                 | 0.69            | 0.49            |
| RCxJulyx2020         | 70.98           | 99.13                 | 0.72            | 0.47            |
| RYxJulyx2020         | 118.43          | 99.13                 | 1.20            | 0.23            |
| RCxJunex2020         | 15.57           | 99.13                 | 0.16            | 0.88            |

|                 |         |        |       |      |
|-----------------|---------|--------|-------|------|
| RYxJunex2020    | 25.91   | 99.13  | 0.26  | 0.79 |
| RCxMayx2020     | 6.38    | 99.13  | 0.06  | 0.95 |
| RYxMayx2020     | -38.67  | 99.13  | -0.39 | 0.70 |
| RCxSeptx2020    | 57.57   | 99.13  | 0.58  | 0.56 |
| RYxSeptx2020    | 23.51   | 99.13  | 0.24  | 0.81 |
| RTxRCxJulyx2020 | -103.32 | 140.19 | -0.74 | 0.46 |
| RTxRYxJulyx2020 | -46.57  | 140.19 | -0.33 | 0.74 |
| RTxRYxJunex2020 | 36.23   | 140.19 | 0.26  | 0.80 |
| RTxRCxMayx2020  | -4.35   | 140.19 | -0.03 | 0.98 |
| RTxRYxMayx2020  | 81.04   | 140.19 | 0.58  | 0.56 |
| RTxRCxSeptx2020 | -5.72   | 140.19 | -0.04 | 0.97 |
| RTxRYxSeptx2020 | -22.33  | 140.19 | -0.16 | 0.87 |
| Random Effect   | sd      |        |       |      |
| Block           | 6.13    |        |       |      |

*P*-values were estimated via t-tests using the Satterthwaite approximations to degrees of freedom. Bolded values indicate a significant effect. Asterisk indicate suggested effect.

**Table S4.** Cover Crop Biomass Mixed Model Results.

| Fixed Effect | Estimate   | Standard Error | <i>t</i> | <i>p</i>        |
|--------------|------------|----------------|----------|-----------------|
| NT           | -108500.00 | 101000.00      | -1.07    | 0.29            |
| RT           | -60550.00  | 101000.00      | -0.60    | 0.55            |
| RC           | 608800.00  | 142900.00      | 4.26     | <b>&lt;0.01</b> |
| RY           | 465200.00  | 142900.00      | 3.26     | <b>&lt;0.01</b> |
| May          | -16030.00  | 142900.00      | -0.11    | 0.91            |
| Sept         | 16030.00   | 142900.00      | 0.11     | 0.91            |
| Year         | 53.77      | 50.04          | 1.08     | 0.29            |
| RTxRC        | -207100.00 | 202100.00      | -1.03    | 0.31            |
| RTxRY        | -75330.00  | 202100.00      | -0.37    | 0.71            |
| RTxMay       | 19270.00   | 202100.00      | 0.10     | 0.92            |
| RTxSept      | -19270.00  | 202100.00      | -0.10    | 0.92            |
| RCxMay       | 340500.00  | 202100.00      | 1.69     | 0.10*           |
| RYxMay       | 222100.00  | 202100.00      | 1.10     | 0.27            |
| RCxSept      | -340500.00 | 202100.00      | -1.69    | 0.09*           |
| RYxSept      | -222100.00 | 202100.00      | -1.10    | 0.27            |
| RTxYear      | -23.73     | 70.76          | -0.34    | 0.74            |
| RCxYear      | -301.30    | 70.76          | -4.26    | <b>&lt;0.01</b> |
| RYxYear      | -230.30    | 70.76          | -3.25    | <b>&lt;0.01</b> |
| MayxYear     | 7.96       | 70.76          | 0.11     | 0.91            |
| SeptxYear    | -7.96      | 70.76          | -0.11    | 0.91            |
| RTxRCxMay    | -97810.00  | 285800.00      | -0.34    | 0.73            |
| RTxRYxMay    | -64070.00  | 285800.00      | -0.22    | 0.82            |
| RTxRCxSept   | 97810.00   | 285800.00      | 0.34     | 0.73            |
| RTxRYxSept   | 64070.00   | 285800.00      | 0.22     | 0.82            |
| RTxRCxYear   | 102.60     | 100.10         | 1.03     | 0.31            |
| RTxRYxYear   | 37.29      | 100.10         | 0.37     | 0.71            |
| RTxMayxYear  | -9.55      | 100.10         | -0.10    | 0.92            |
| RTxSeptxYear | 9.55       | 100.10         | 0.10     | 0.92            |
| RCxMayxYear  | -168.50    | 100.10         | -1.68    | 0.10            |
| RYxMayxYear  | -109.90    | 100.10         | -1.10    | 0.27            |
| RCxSeptxYear | 168.50     | 100.10         | 1.68     | 0.09*           |

|                 |        |        |       |      |
|-----------------|--------|--------|-------|------|
| RYxSeptxYear    | 109.90 | 100.10 | 1.10  | 0.27 |
| RTxRCxMayxYear  | 48.44  | 141.50 | 0.34  | 0.73 |
| RTxRYxMayxYear  | 31.72  | 141.50 | 0.22  | 0.82 |
| RTxRCxSeptxYear | -48.44 | 141.50 | -0.34 | 0.73 |
| RTxRYxSeptxYear | -31.72 | 141.50 | -0.22 | 0.82 |
| Random Effect   | sd     |        |       |      |
| Block           | 13.9   |        |       |      |

*P*-values were estimated via t-tests using the Satterthwaite approximations to degrees of freedom. Bolded values indicate a significant effect. Asterisk indicate a marginal effect.

**Table S5. %OC to CO<sub>2</sub> Flux Mixed Model Results.**

| <b>Fixed Effect</b> | <b>Estimate</b> | <b>Standard Error</b> | <b><i>t</i></b> | <b><i>p</i></b> |
|---------------------|-----------------|-----------------------|-----------------|-----------------|
| NT                  | 0.98            | 0.15                  | 6.74            | <b>&lt;0.01</b> |
| RT                  | 0.48            | 0.15                  | 3.33            | <b>0.01</b>     |
| RC                  | 0.31            | 0.14                  | 2.30            | <b>0.02</b>     |
| RY                  | 0.16            | 0.14                  | 1.19            | 0.24            |
| RTxRC               | -0.02           | 0.19                  | -0.08           | 0.94            |
| RTxRY               | 0.23            | 0.19                  | 1.18            | 0.24            |
| Random Effect       | sd              |                       |                 |                 |
| Block               | 0.21            |                       |                 |                 |

*P*-values were estimated via t-tests using the Satterthwaite approximations to degrees of freedom. Bolded values indicate a significant effect

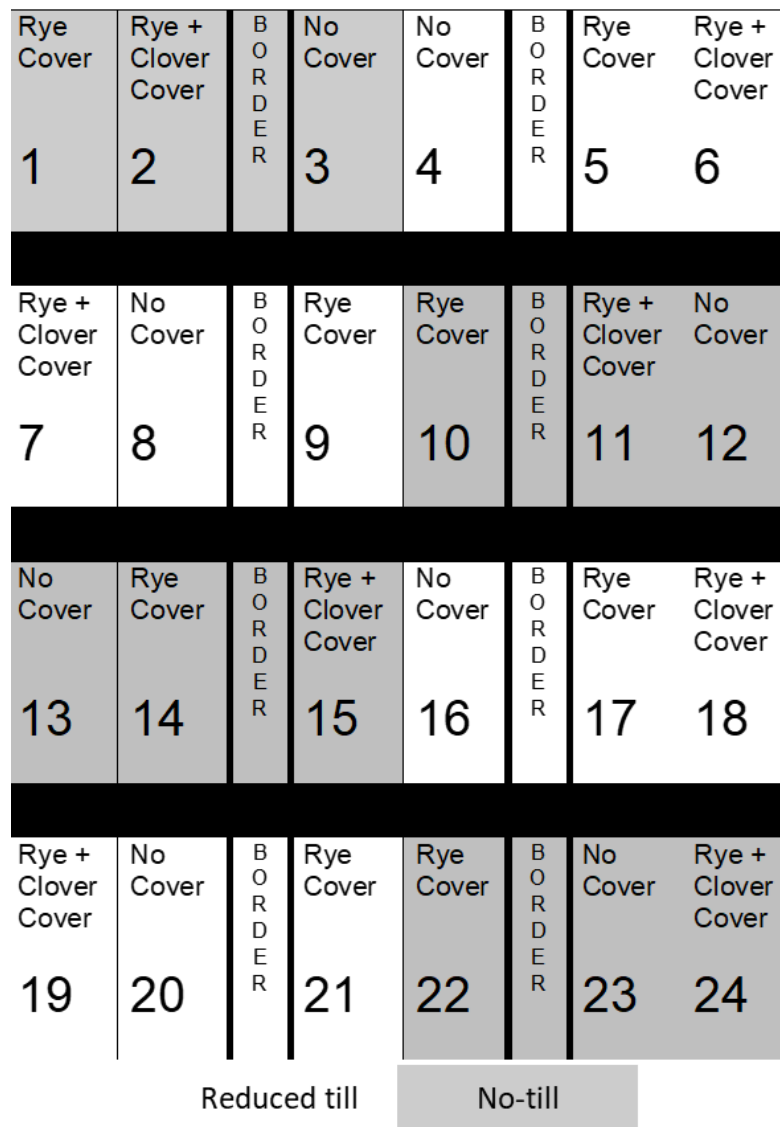

**Figure S1.** Treatment plot map, treatment plot layout of study in Stoneville, MS, USA. Plots were in a split-block design, each block separated by a solid black bar. Cover crop treatments (rye, rye + clover or no cover) were implemented on plots under a reduced till (white) or no-till regime (grey).
